# Supplementary material for: The mitochondrial permeability transition pore activates the mitochondrial unfolded protein response and promotes aging
Source: eLife. 2021 Sep 1;10:e63453. doi: 10.7554/eLife.63453 (PMC8410078; doi:10.7554/eLife.63453)
Supplement: Figure 2—source data 1. [file elife-63453-fig2-data1.xlsx]

## Sheet: Sheet1
	Figure 2-source data 1
	gene	dvUPRmt	pdvUPRmt	pdvUPRmt fold change	pdvUPRmt p-value
Complex I	nuo-1	yes	yes	2.6	0.0002
	nuo-2	yes	yes	2.1	0.0155
Complex III	cyc-1	yes	yes	2.1	<0.0001
Complex IV	cco-1	yes	no	1.9	0.0511
Complex V	atp-2	yes	yes	2.7	0.0029
	atp-3	yes	yes	71.6	<0.0001
Other	clk-1	yes	yes	-1.5	0.0064
	mrps-5	yes	yes	1	0.9671
	tomm-22	yes	yes	1.8	0.0004
