# Supplementary material for: The mitochondrial permeability transition pore activates the mitochondrial unfolded protein response and promotes aging
Source: eLife. 2021 Sep 1;10:e63453. doi: 10.7554/eLife.63453 (PMC8410078; doi:10.7554/eLife.63453)
Supplement: Figure 2—source data 2. [file elife-63453-fig2-data2.xlsx]

## Sheet: Sheet1
	Figure 2 - source data 2
	Strain	Median lifespan (days)	Deaths/Events	Censored Animals	Deaths/Censored	P-value
Development	N2; CV	15	48	20	48/20
	N2; atp-3	26.5	34	30	34/30	*** < 0.0001
	N2; CV	15	161	38	161/38
Post-development	N2; atp-3	10	181	20	181/20	*** < 0.0001
	atfs-1; CV	12	117	63	117/63
	atfs-1; atp-3	9	157	31	157/31	*** < 0.0001
	N2; CV	17	116	27	116/27
	N2; cyc-1	17	137	22	137/22	0.6097
	N2; cco-1	17	139	6	139/6	0.2826
	N2; atp-2	15	131	22	131/22	** 0.0067
	N2; nuo-2	17	128	27	128/27	0.5893
Post-development	N2; CV	15	124	33	124/33
	N2; atp-3	13	130	16	130/16	*** < 0.0001
	N2; cv 15uM CysA	17	85	24	85/24
	N2; atp-3 15uM CysA	17	112	35	112/35	0.6084
Post-development	N2; CV	15	278	11	278/11
	N2; atp-1	13	287	13	287/13	** 0.0039
						Compared to CV	Compared to corresponding RNAi
Post-development	N2; CV	15	199	10	199/10
	N2; CV/atp-3	13	183	48	183/48	*** < 0.0001
	N2; CV/asb-2	15	193	4	193/4	0.4473
	N2; atp-3/asb-2	15	198	6	198/6		0.0811
	N2; CV/Y82E9BR.3	20	135	0	135/0	*** < 0.0001
	N2; atp-3/Y82E9BR.3	20	129	6	129/6		0.2578
						Compared to CV	Compared to corresponding RNAi
Post-development	N2; CV	20	106	11	106/11
	N2; CV/atp-3	13	106	10	106/10	*** < 0.0001
	N2; CV/atp-4	20	110	8	110/8	0.5035
	N2; atp-3/atp-4	17	108	3	108/3		0.3437
	N2; CV/atp-5	15	86	2	86/2	** 0.0006
	N2; atp-3/atp-5	20	100	5	100/5		** 0.0036
						Compared to CV	Compared to corresponding RNAi
development; post-development	N2; CV; CV	15	139	0	139/0
	N2; CV; atp-3	10	138	2	138/2	*** < 0.0001
	N2; cco-1; CV	17	87	13	87/13	** 0.0031
	N2; cco-1; atp-3	17	102	30	102/30		0.6294
