# Supplementary material for: The mitochondrial permeability transition pore activates the mitochondrial unfolded protein response and promotes aging
Source: eLife. 2021 Sep 1;10:e63453. doi: 10.7554/eLife.63453 (PMC8410078; doi:10.7554/eLife.63453)
Supplement: Figure 3—source data 1. [file elife-63453-fig3-data1.xlsx]

## Sheet: Sheet1
	Figure 3 - source data 1
	gene	MTS
	cyn-1	0.941
	cyn-2	0
	cyn-3	0
	cyn-4	0
	cyn-5	0
	cyn-6	0
	cyn-7	0
	cyn-8	0
	cyn-9	0
	cyn-10	0
	cyn-11	0
	cyn-12	0
	cyn-13	0
	cyn-14	0
	cyn-15	0
	cyn-16	0
	cyn-17	0.154
	atfs-1	0.117
