# Supplementary material for: The mitochondrial permeability transition pore activates the mitochondrial unfolded protein response and promotes aging
Source: eLife. 2021 Sep 1;10:e63453. doi: 10.7554/eLife.63453 (PMC8410078; doi:10.7554/eLife.63453)
Supplement: Figure 4—source data 1. [file elife-63453-fig4-data1.xlsx]

## Sheet: Sheet1
	Figure 4-source data 1
Complex V	gene	subunit	dvUPRmt	pdvUPRmt	pdvUPRmt fold change	pdvUPRmt p-value
F1 ATPase	atp-1	a	yes	yes	19.7	0.0004
F1 ATPase	atp-2	b	yes	yes	2.7	0.0029
F1 ATPase	F58F12.1	d	yes	yes	1.5	0.041
F1 ATPase	hpo-18	e	yes	yes	12.3	<0.0001
F1 peripheral stalk	atp-3	OSCP	yes	yes	55.4	<0.0001
F1 peripheral stalk	asb-2	b	yes	no	1.9	0.0797
F1 peripheral stalk	atp-5	d	yes	no	1.1	0.6388
F1 peripheral stalk	atp-4	F6	yes	no	1.2	0.2206
Fo rotor	Y82E9BR.3	c	yes	yes	3.8	0.0003
Fo supernumerary	R04F11.2	e	yes	no	1	0.9604
Fo supernumerary	R53.4	F6	yes	no	1.1	0.7152
